# Supplementary material for: Assessing the Long-Term Persistence of SARS-CoV-2 in Guinea: Insights from Post- Epidemic Sentinel Syndromic Surveillance Data
Source: Research Square preprint supplement (doi:10.21203/rs.3.rs-5398368/v1), 2024-12-09
Supplement: Supplementary file 1 [file d31647043d9b6d2005d65135.docx]

**Table 2**: Clinical symptoms, medical story, vaccination and exposure status of suspected cases received at COVID-19 sentinel surveillance sites in Conakry (October 2022-July 2024)

| **Characteristic** | **N** | **%** |
| --- | --- | --- |
| **Sign** | 1,136 | 97 |
| Fever | 781 | 67 |
| Cough | 977 | 83 |
| Dyspnea | 388 | 83 |
| Throat | 537 | 46 |
| Cold | 879 | 75 |
| Agueusia | 310 | 26 |
| Anosmia | 237 | 20 |
| Fatigue | 675 | 20 |
| Headache | 805 | 69 |
| Muscle soreness | 429 | 37 |
| **Medical history** | 406 | 35 |
| Obesity | 16 | 1.4 |
| Diabetes | 48 | 4.1 |
| Hypertension | 138 | 12 |
| TB | 150 | 13 |
| HIV | 37 | 3.2 |
| Sinusitis | 34 | 2.9 |
| **Degree disease severity** |  |  |
| Moderate | 874 | 74 |
| Severe | 101 | 8.6 |
| Simple | 199 | 17 |
| **Hospitalization** | 345 | 29 |
| **Vaccination** | 569 | 48 |
| SinoVac/Sinopharm | 332 | 28 |
| Johnson-Johnson | 217 | 18 |
| **Exposure status** |  |  |
| Travel | 56 | 4.8 |
| Contact of suspected or confirmed case | 55 | 4.7 |
| gathering | 746 | 64 |
| Exposed similar symptom | 192 | 16 |
