# Supplementary material for: Assessing the Long-Term Persistence of SARS-CoV-2 in Guinea: Insights from Post- Epidemic Sentinel Syndromic Surveillance Data
Source: Research Square preprint supplement (doi:10.21203/rs.3.rs-5398368/v1), 2024-12-09
Supplement: Supplementary file 2 [file dbe8151f1ec058c952aad908.docx]

**Table 1**: Characteristics of Suspected COVID-19 Cases received at COVID-19 sentinel surveillance sites in Conakry (October 2022 - July 2024)

| **Characteristic** | **N or Me(IQR)** | % |
| --- | --- | --- |
| **Age (years)** |  |  |
| 1 -17 | 212 | 18 |
| 18 - 24 | 205 | 17 |
| 25 - 40 | 356 | 30 |
| 40 + | 401 | 34 |
| Median (IQR) | 31 (20, 51) |  |
| **Sex** |  |  |
| Female | 599 | 51 |
| Male | 575 | 49 |
| **Marital status** |  |  |
| Divorced | 14 | 1.2 |
| Married | 556 | 47 |
| Single | 517 | 44 |
| Widow(er) | 87 | 7.4 |
| **Surroundings** | 5.00 (4.00, 7.00) |  |
| **Instruction** |  |  |
| None | 253 | 22 |
| Literate | 35 | 3.0 |
| Primary | 176 | 15 |
| Secondary | 348 | 30 |
| Higher | 362 | 31 |
