# Supplementary material for: Assessing the Long-Term Persistence of SARS-CoV-2 in Guinea: Insights from Post- Epidemic Sentinel Syndromic Surveillance Data
Source: Research Square preprint supplement (doi:10.21203/rs.3.rs-5398368/v1), 2024-12-09
Supplement: Supplementary file 3 [file f69cbf13f0f496ab7ca81524.docx]

**Table 3**: Basic and Effective Reproduction Numbers of Omicron and its sub-variants in the COVID-19 Post-Epidemic Period in Guinea, October 2022 - July 2024

| **Omicron and sub-variants** | **Basic reproduction number**  **R0 [IC95%]** | **Effective reproduction number Rt [IC95%]** |
| --- | --- | --- |
| Global | 1.85 [0.96-3.04] | 2.08 [0.35-5.85] |
| BA.2 | 5.0 [0.13-18.44] | 4.79 [0.14-17.5] |
| BA.2.86 | 5.0 [0.13-18.44] | 5.0 [0.13-18.44] |
| BA.5.2.1 | 0.65 [0.08-1.82] | 4.91 [0.12-18.1] |
| BQ.1 | 2.2 [0.27-6.12] | 4.91 [0.13-18.08] |
| BQ.1.1 | 2.09 [0.43-5.04] | 4.69 [0.14-17.13] |
| XBB | 5.0 [0.13-18.44] | 4.91 [0.13-18.06] |
| XBB.1 | 5.0 [0.13-18.44] | 4.6 [0.15-16.69] |
| XBB.1.17.1 | 5.0 [0.13-18.44] | 5.0 [0.13-18.44] |
| XBB.1.4 | 5.0 [0.13-18.44] | 4.78 [0.14-17.46] |
| XBB.1.5 | 10 [1.21-27.86] | 3.9 [0.19-13.74] |
| XBB.1.5.4 | 5.0 [0.13-18.44] | 4.83 [0.14-17.68] |
| XBB.1.5.18 | 5.0 [0.13-18.44] | 4.91 [0.13-18.06] |
